# Supplementary material for: Highly trans-1,4-stereoselective coordination chain transfer polymerization of 1,3-butadiene and copolymerization with cyclic esters by a neodymium-based catalyst system
Source: Royal Society of Chemistry journal article supplement (doi:10.1039/c5py00877h), 2015-01-01
Supplement: c5py00877h1.pdf [file c5py00877h1.pdf]

## Supporting information for

# Highly trans-1,4-stereoselective coordination chain transfer polymerization of 1,3-butadiene and copolymerization with cyclic esters by neodymium-based catalyst system

Wenjie Zheng<sup>1,2</sup>, Nan Yan<sup>2,3</sup>, Yutian Zhu<sup>3</sup>, Wenpeng Zhao<sup>1,2</sup>, Chunyu Zhang<sup>1</sup>, Chenxi Bai<sup>1</sup>,  
Yanming Hu<sup>1\*</sup>, Xuequan Zhang<sup>1\*</sup>

<sup>1</sup>Key Laboratory of Synthetic Rubber, Changchun Institute of Applied Chemistry, Chinese Academy of Sciences, Changchun 130022, China

<sup>2</sup>University of the Chinese Academy of Sciences, Beijing 100039, China

<sup>3</sup>State Key Laboratory of Polymer Physics and Chemistry, Changchun Institute of Applied Chemistry, Chinese Academy of Sciences, Changchun, 130022, China

\*Corresponding author: E-mail: [xqzhang@ciac.ac.cn](mailto:xqzhang@ciac.ac.cn) (X. Zhang); [ymhu@ciac.ac.cn](mailto:ymhu@ciac.ac.cn) (Y. Hu).

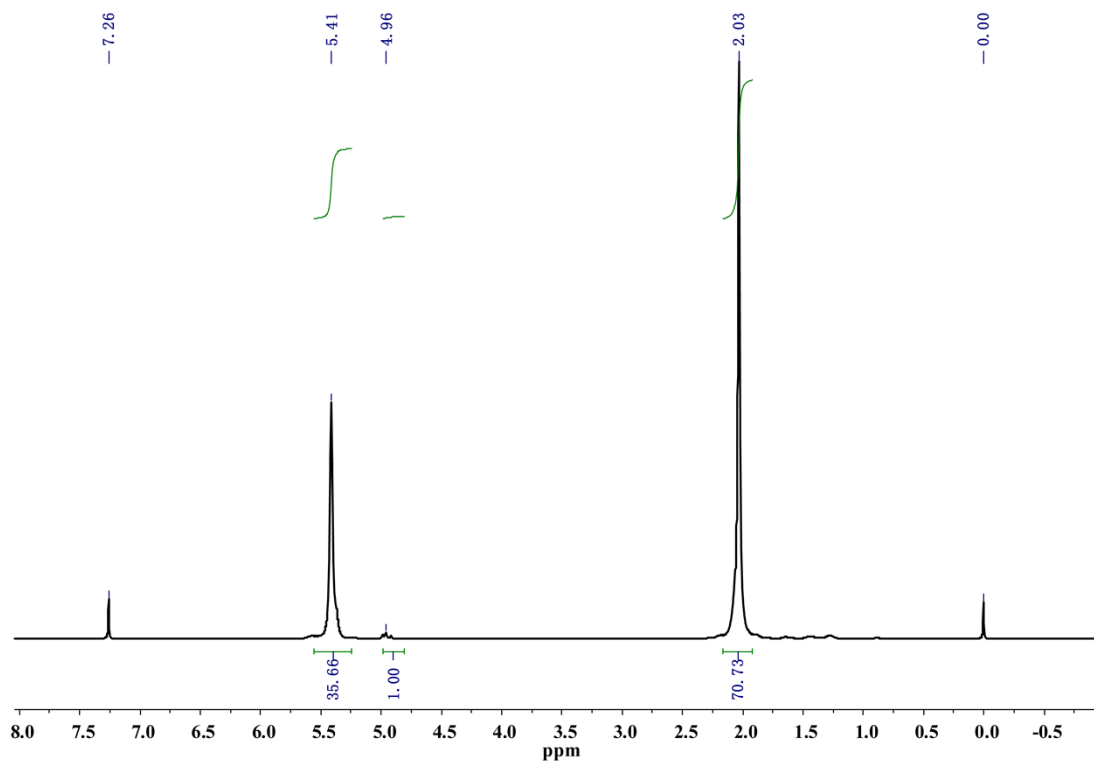

**Fig. S1**  $^1\text{H}$ NMR spectrum of *trans*-1,4- polybutadiene (run 3 in table 1).

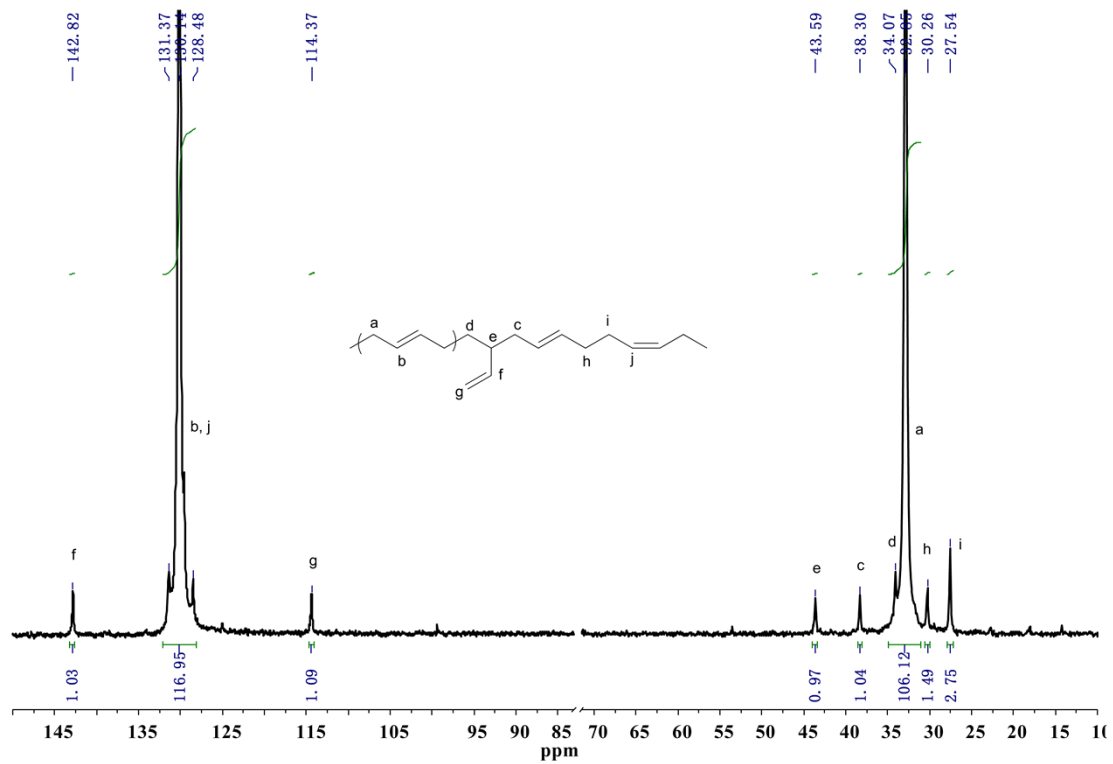

**Fig. S2**  $^{13}\text{C}$  NMR spectrum of *trans*-1,4- polybutadiene (run 3 in table 1).

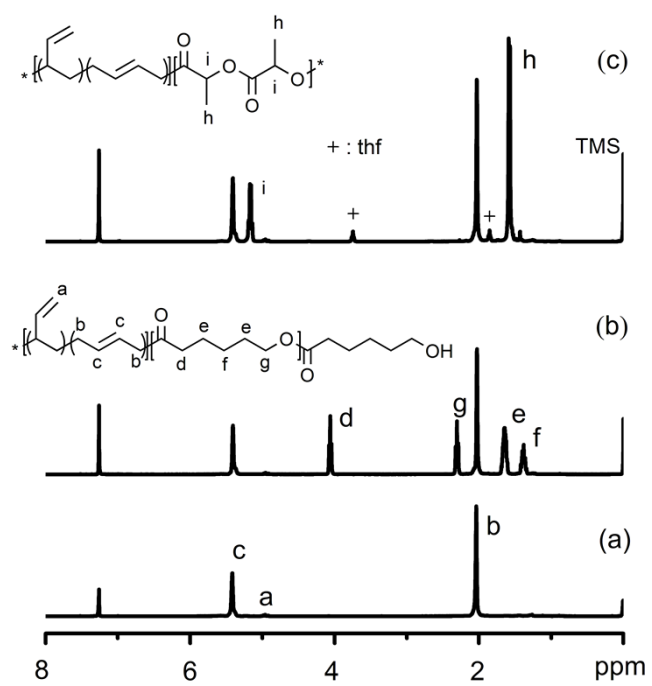

**Fig. S3**  $^1\text{H NMR}$  spectra of (a) TPB, (b) TPB-*b*-PCL copolymer, and (c) TPB-*b*-PLA copolymer.

Table 1. the dn/dc values of TPB-*b*-PCL copolymers.

| Copolymer                     | TPB- <i>b</i> -PCL  |                     |                     |
|-------------------------------|---------------------|---------------------|---------------------|
| $\epsilon$ -CL content (mol%) | 27.2                | 46.3                | 62.3                |
| dn/dc (ml/g)                  | $0.1050 \pm 0.0005$ | $0.0916 \pm 0.0007$ | $0.0820 \pm 0.0010$ |

Table 2. the dn/dc values of TPB-*b*-PLA copolymers.

| Copolymer         | TPB- <i>b</i> -PLA  |                     |                     |
|-------------------|---------------------|---------------------|---------------------|
| LA content (mol%) | 20.5                | 46.0                | 75.0                |
| dn/dc (ml/g)      | $0.0742 \pm 0.0007$ | $0.0742 \pm 0.0007$ | $0.0742 \pm 0.0007$ |
